# 1 Cricket genomes: the genomes of future food

2 Guillem Ylla<sup>1\*</sup>, Taro Nakamura<sup>1,2</sup>, Takehiko Itoh<sup>3</sup>, Rei Kajitani<sup>3</sup>, Atsushi Toyoda<sup>4,5</sup>, Sayuri  
3 Tomonari<sup>6</sup>, Tetsuya Bando<sup>7</sup>, Yoshiyasu Ishimaru<sup>6</sup>, Takahito Watanabe<sup>6</sup>, Masao Fuketa<sup>8</sup>, Yuji  
4 Matsuoka<sup>6,9</sup>, Sumihare Noji<sup>6</sup>, Taro Mito<sup>6\*</sup>, Cassandra G. Extavour<sup>1,10\*</sup>

- 5
- 6 1. Department of Organismic and Evolutionary Biology, Harvard University,  
7 Cambridge, USA
  - 8 2. Current address: National Institute for Basic Biology, Okazaki, Japan
  - 9 3. School of Life Science and Technology, Tokyo Institute of Technology, Tokyo, Japan
  - 10 4. Comparative Genomics Laboratory, National Institute of Genetics, Shizuoka, Japan
  - 11 5. Advanced Genomics Center, National Institute of Genetics, Shizuoka, Japan
  - 12 6. Department of Bioscience and Bioindustry, Tokushima University, Tokushima, Japan
  - 13 7. Graduate School of Medicine, Pharmacology and Dentistry, Okayama University,  
14 Okayama, Japan
  - 15 8. Graduate School of Advanced Technology and Science, Tokushima University,  
16 Tokushima, Japan
  - 17 9. Current address: Department of Biological Sciences, National University  
18 of Singapore, Singapore
  - 19 10. Department of Molecular and Cellular Biology, Harvard University, Cambridge, USA  
20

21 \* correspondence to [guillemyllabou@gmail.com](mailto:guillemyllabou@gmail.com), [mito.taro@tokushima-u.ac.jp](mailto:mito.taro@tokushima-u.ac.jp) and  
22 [extavour@oeb.harvard.edu](mailto:extavour@oeb.harvard.edu)

23

## 24 **Abstract**

25

26 Crickets are currently in focus as a possible source of animal protein for human consumption  
27 as an alternative to protein from vertebrate livestock. This practice could ease some of the  
28 challenges both of a worldwide growing population and of environmental issues. The two-  
29 spotted Mediterranean field cricket *Gryllus bimaculatus* has traditionally been consumed by  
30 humans in different parts of the world. Not only is this considered generally safe for human  
31 consumption, several studies also suggest that introducing crickets into one's diet may  
32 confer multiple health benefits. Moreover, *G. bimaculatus* has been widely used as a  
33 laboratory research model for decades in multiple scientific fields including evolution,  
34 developmental biology, neurobiology, and regeneration. Here we report the sequencing,  
35 assembly and annotation of the *G. bimaculatus* genome, and the annotation of the genome of  
36 the Hawaiian cricket *Laupala kohalensis*. The comparison of these two cricket genomes with  
37 those of 14 additional insects supports the hypothesis that a relatively small ancestral insect  
38 genome expanded to large sizes in many hemimetabolous lineages due to transposable  
39 element activity. Based on the ratio of observed versus expected CpG sites ( $CpG_{o/e}$ ), we find  
40 higher conservation and stronger purifying selection of typically methylated genes than of  
41 non-methylated genes. Finally, our gene family expansion analysis reveals an expansion of  
42 the *pickpocket* class V gene family in the lineage leading to crickets, which we speculate might  
43 play a relevant role in cricket courtship behavior, including their characteristic chirping.

## 44 Introduction

45 Multiple orthopteran species, and crickets in particular, are currently in focus as a source of  
46 animal protein for human consumption and for vertebrate livestock. Insect consumption, or  
47 entomophagy, is currently practiced in some populations, including some countries within  
48 Africa, Asia, and South America (Kouřimská & Adámková, 2016), but is relatively rare in most  
49 European and North American countries. The use of insects for human consumption and  
50 animal feeding could help both to decrease the emission of greenhouse gases, and to reduce  
51 the land extension considered necessary to feed the growing worldwide population. Crickets  
52 are especially attractive insects as a food source, since they are already found in the  
53 entomophagous diets of many countries (Van Huis et al., 2013), and possess high nutritional  
54 value. Crickets have a high proportion of protein for their body weight (>55%), and contain  
55 the essential linoleic acid as their most predominant fatty acid (Ghosh, Lee, Jung, & Meyer-  
56 Rochow, 2017; Kouřimská & Adámková, 2016; Van Huis et al., 2013).

57 The two-spotted Mediterranean field cricket *Gryllus bimaculatus* has traditionally been  
58 consumed in different parts of the world. In northeast Thailand, which recorded 20,000  
59 insect farmers in 2011 (Hanboonsong, Jamjanya, & Durst, 2013), it is one of the most  
60 marketed and consumed insect species. Studies have reported no evidence for toxicological  
61 effects related to oral consumption of *G. bimaculatus* by humans (Ahn, Han, Kim, Hwang, &  
62 Yun, 2011; Ryu et al., 2016), neither were genotoxic effects detected using three different  
63 mutagenicity tests (Mi et al., 2005). A rare but known health risk associated with cricket  
64 consumption, however, is sensitivity and allergy to crickets (Pener, 2016; Ribeiro, Cunha,  
65 Sousa-Pinto, & Fonseca, 2018), especially in people allergic to seafood, shown by cross-  
66 allergies between *G. bimaculatus* and *Macrobrachium* prawns (Srinroch, Srisomsap,  
67 Chokchaichamnankit, Punyarit, & Phiriyangkul, 2015).

68 Not only is the cricket *G. bimaculatus* considered generally safe for human consumption,  
69 several studies also suggest that introducing crickets into one's diet may confer multiple  
70 health benefits. Water soluble compounds derived from ethanol extracts of whole adult *G.*  
71 *bimaculatus* applied to cultured mouse spleen cells were reported to stimulate the  
72 expression of multiple cytokines associated with immune cell proliferation and activation  
73 (Dong-Hwan et al., 2004). Rats treated with ethanol extracts of whole adult *G. bimaculatus*  
74 showed signs of reduced aging, including characteristic aging-associated gene expression  
75 profiles, and reduced levels of markers of DNA oxidative damage, (Ahn, Hwang, Yun, Kim, &  
76 Park, 2015). Glycosaminoglycans derived from *G. bimaculatus* were reported to elicit some  
77 anti-inflammatory effects in a rat model of chronic arthritis (Ahn, Han, Hwang, Yun, & Lee,  
78 2014). Rats fed a diet including an ethanol extract of *G. bimaculatus* accumulated less  
79 abdominal fat and had lower serum glucose levels than control animals (Ahn, Kim, Kwon,  
80 Hwang, & Park, 2015). More recent studies suggest that *G. bimaculatus* powder has  
81 antidiabetic effects in rat models of Type I diabetes (Park, Lee, Lee, Hoang, & Chae, 2019)  
82 and protects against acute alcoholic liver damage in mice (Hwang et al., 2019). Beyond

83 rodent models, a study of healthy adult human subjects showed that the intake of 25g/day  
84 of the powdered cricket species *Grylloides sigillatus* supported growth of some probiotic  
85 microbiota, and correlated with reduced expression of the pro-inflammatory cytokine TNF-  
86  $\alpha$  (Stull et al., 2018).

87 Although crickets are becoming economically important players in the food industry, there  
88 are currently no publicly available annotated cricket genomes from any of these typically  
89 consumed species. Here, we present the 1.66-Gb genome assembly and annotation of *G.*  
90 *bimaculatus*, commonly known as the two-spotted cricket, a name derived from the two  
91 yellow spots found on the base of the forewings of this species (**Figure 1A**).

92 *G. bimaculatus* has been widely used as a laboratory research model for decades, in scientific  
93 fields including neurobiology and neuroethology (Fisher et al., 2018; Huber, Moore, & Loher,  
94 1989), evo-devo (Kainz, Ewen-Campen, Akam, & Extavour, 2011), developmental biology  
95 (Donoughe & Extavour, 2015), and regeneration (Mito & Noji, 2008). Technical advantages  
96 of this cricket species as a research model include the fact that *G. bimaculatus* does not  
97 require cold temperatures or diapause to complete its life cycle, it is easy to rear in  
98 laboratories since it can be fed with generic insect or other pet foods, it is amenable to RNA  
99 interference (RNAi) and targeted genome editing (Kulkarni & Extavour, 2019), stable  
100 germline transgenic lines can be established (Shinmyo et al., 2004), and it has an extensive  
101 list of available experimental protocols ranging from behavioral to functional genetic  
102 analyses (Wilson Horch, Mito, Popadić, Ohuchi, & Noji, 2017).

103 We also report the first genome annotation for a second cricket species, the Hawaiian cricket  
104 *Laupala kohalensis*, whose genome assembly was recently made public (Blankers, Oh,  
105 Bombarely, & Shaw, 2018). Comparing these two cricket genomes with those of 14 other  
106 insect species allowed us to identify three interesting features of these cricket genomes,  
107 some of which may relate to their unique biology. First, the differential transposable element  
108 (TE) composition between the two cricket species suggests abundant TE activity since they  
109 diverged from a last common ancestor, which our results suggest occurred circa 89.2 million  
110 years ago (Mya). Second, based on gene CpG depletion, an indirect but robust method to  
111 identify typically methylated genes (Bewick, Vogel, Moore, & Schmitz, 2016; Bird, 1980), we  
112 find higher conservation of typically methylated genes than of non-methylated genes.  
113 Finally, our gene family expansion analysis reveals an expansion of the *pickpocket* class V  
114 gene family in the lineage leading to crickets, which we speculate might play a relevant role  
115 in cricket courtship behavior, including their characteristic chirping.

## 116 **Results**

### 117 ***Gryllus bimaculatus* genome assembly**

118 We sequenced, assembled, and annotated the 1.66-Gb haploid genome of the white eyed  
119 mutant strain (Mito & Noji, 2008) of the cricket *G. bimaculatus* (**Figure 1A**). 50% of the

120 genome is contained within the 71 longest scaffolds (L50), the shortest of them having a  
121 length of 6.3 Mb (N50), and 90% of the genome is contained within 307 scaffolds (L90). In  
122 comparison to other hemimetabolous genomes, and in particular, to polyneopteran  
123 genomes, our assembly displays high-quality scores by a number of metrics  
124 (**Supplementary Table 1**). Notably, the BUSCO scores (Simão, Waterhouse, Ioannidis,  
125 Kriventseva, & Zdobnov, 2015) of this genome assembly at the arthropod and insect levels  
126 are 98.50% and 97.00% respectively, indicating high completeness of this genome assembly  
127 (**Table 1**). The low percentage of duplicated BUSCO genes (1.31%-1.81%) suggests that  
128 putative artifactual genomic duplication due to mis-assembly of heterozygotic regions is  
129 unlikely.

130

131

**Table 1:** *Gryllus bimaculatus* genome assembly statistics.

|                          |               |
|--------------------------|---------------|
| Number of Scaffolds      | 47,877        |
| Genome Length (nt)       | 1,658,007,496 |
| Genome Length (Gb)       | 1.66          |
| Avg. scaffold size (Kb)  | 34.63         |
| N50 (Mb)                 | 6.29          |
| N90 (Mb)                 | 1.04          |
| L50                      | 71            |
| L90                      | 307           |
| BUSCO Score – Arthropoda | 98.50%        |
| BUSCO Score – Insecta    | 97.00%        |

132

### 133 **Annotation of two cricket genomes**

134 The publicly available 1.6-Gb genome assembly of the Hawaiian cricket *L. kohalensis*  
135 (Blankers, Oh, Bombarely, et al., 2018), although having lower assembly statistics than that  
136 of *G. bimaculatus* (N50=0.58 Mb, L90 = 3,483), scores high in terms of completeness, with  
137 BUSCO scores of 99.3% at the arthropod level and 97.80% at the insect level  
138 (**Supplementary Table 1**).

139 Using three iterations of the MAKER2 pipeline (Holt & Yandell, 2011), in which we combined  
140 *ab-initio* and evidence-based gene models, we annotated the protein-coding genes in both  
141 cricket genomes (**Supplementary Figures 1 & 2**). We identified 17,871 coding genes and  
142 28,529 predicted transcripts for *G. bimaculatus*, and 12,767 coding genes and 13,078  
143 transcripts for *L. kohalensis* (**Table 2**).

144 To obtain functional insights into the annotated genes, we ran InterProScan (Jones et al.,  
145 2014) for all predicted protein sequences and retrieved their InterPro ID, PFAM domains,  
146 and Gene-Ontology (GO) terms (**Table 2**). In addition, we retrieved the best significant  
147 BLASTP hit (E-value < 1e-6) for 70-90% of the proteins. Taken together, these methods  
148 predicted functions for 75% and 94% of the proteins annotated for *G. bimaculatus* and *L.*  
149 *kohalensis* respectively. We created a novel graphic interface through which interested  
150 readers can access, search, BLAST and download the genome data and annotations  
151 (<http://34.71.36.157:3838/>).

152

153 **Table 2:** Genome annotation summary for the crickets *G. bimaculatus* and *L. kohalensis*

|                                     | <i>G. bimaculatus</i> | <i>L. kohalensis</i> |
|-------------------------------------|-----------------------|----------------------|
| Annotated Protein-Coding Genes      | 17,871                | 12,767               |
| Annotated Transcripts               | 28,529                | 13,078               |
| % With InterPro ID                  | 59.56%                | 72.52%               |
| % With GO-terms                     | 38.66%                | 47.03%               |
| % With PFAM motif                   | 62.44%                | 76.59%               |
| % With significant BLASTP hit       | 73.64%                | 93.23%               |
| BUSCO-transcriptome Score – Insecta | 92.30%                | 87.20%               |
| Repetitive content                  | 33.69%                | 35.51%               |
| TE content                          | 28.94%                | 34.50%               |
| GC level                            | 39.93%                | 35.58%               |

## 154 **Abundant Repetitive DNA**

155 We used RepeatMasker (Smit, Hubley, & Grenn, 2015) to determine the degree of repetitive  
156 content in the cricket genomes, using specific custom repeat libraries for each species. This  
157 approach identified 33.69% of the *G. bimaculatus* genome, and 35.51% of the *L. kohalensis*  
158 genome, as repetitive content (**Supplementary File 1**). In *G. bimaculatus* the repetitive  
159 content density was similar throughout the genome, with the exception of two scaffolds that  
160 contained 1.75x-1.82x the density of repetitive content than the mean of the other N90  
161 scaffolds (**Figure 1B**). Transposable elements (TEs) accounted for 28.94% of this repetitive  
162 content in the *G. bimaculatus* genome, and for 34.50% of the repetitive content in the *L.*  
163 *kohalensis* genome. Although the overall proportion of repetitive content made up of TEs was  
164 similar between the two cricket species, the proportion of each specific TE class varied  
165 greatly (**Figure 1C**). In *L. kohalensis* the most abundant TE type was long interspersed  
166 elements (LINEs), accounting for 20.21% of the genome, while in *G. bimaculatus* LINEs made  
167 up only 8.88% of the genome. The specific LINE subtypes LINE1 and LINE3 appeared at a  
168 similar frequency in both cricket genomes (<0.5%), while the LINE2 subtype was over five

169 times more represented in *L. kohalensis*, covering 10% of the genome (167 Mb). On the other  
170 hand, DNA transposons accounted for 8.61% of the *G. bimaculatus* genome, but only for  
171 3.91% of the *L. kohalensis* genome.

## 172 DNA methylation

173 CpG depletion, calculated as the ratio between observed versus the expected incidence of a  
174 cytosine followed by a guanine (CpG<sub>o/e</sub>), is considered a reliable indicator of DNA  
175 methylation. This is because spontaneous C to T mutations occur more frequently on  
176 methylated CpGs than unmethylated CpGs (Bird, 1980). Thus, genomic regions that undergo  
177 methylation are eventually CpG-depleted. We calculated the CpG<sub>o/e</sub> value for each predicted  
178 protein-coding gene for the two cricket species. In both species, we observed a clear bimodal  
179 distribution of CpG<sub>o/e</sub> values (**Figure 2A**). One interpretation of this distribution is that the  
180 peak corresponding to lower CpG<sub>o/e</sub> values contains genes that are typically methylated, and  
181 the peak of higher CpG<sub>o/e</sub> contains genes that do not undergo DNA methylation. Under this  
182 interpretation, some genes have non-random differential DNA methylation in crickets. To  
183 quantify the genes in the two putative methylation categories, we set a CpG<sub>o/e</sub> threshold as  
184 the value of the point of intersection between the two normal distributions (**Figure 2A**).  
185 After applying this cutoff, 44% of *G. bimaculatus* genes and 45% of *L. kohalensis* genes were  
186 identified as CpG-depleted.

187 A GO enrichment analysis of the genes above and below the CpG<sub>o/e</sub> threshold defined above  
188 revealed clear differences in the predicted functions of genes belonging to each of the two  
189 categories. Strikingly, however, genes in each threshold category had functional similarities  
190 across the two cricket species (**Figure 2A**). Genes with low CpG<sub>o/e</sub> values, which are likely  
191 those undergoing methylation, were enriched for functions related to DNA replication and  
192 regulation of gene expression (including transcriptional, translational, and epigenetic  
193 regulation), while genes with high CpG<sub>o/e</sub> values, suggesting little or no methylation, tended  
194 to have functions related to metabolism, catabolism, and sensory systems.

195 To assess whether the predicted distinct functions of high- and low- CpG<sub>o/e</sub> value genes were  
196 specific to crickets, or were a potentially more general trend of insects with DNA methylation  
197 systems, we analyzed the predicted functions of genes with different CpG<sub>o/e</sub> values in the  
198 honeybee *Apis mellifera*. This bee was the first insect for which evidence for DNA methylation  
199 was robustly described and studied (Elango, Hunt, Goodisman, & Yi, 2009; Y. Wang et al.,  
200 2006). We found that in *A. mellifera*, CpG-depleted genes were enriched for similar functions  
201 as those observed in cricket CpG-depleted genes (26 GO-terms were significantly enriched  
202 in both honeybee and crickets; **Supplementary Figure 3**). In the same way, high CpG<sub>o/e</sub>  
203 genes in both crickets and honeybee were enriched for similar functions (12 GO-terms  
204 commonly enriched; **Supplementary Figure 3**).

205 Additionally, we observed that genes belonging to the low CpG<sub>o/e</sub> peak were more likely to  
206 have an orthologous gene in another insect species, and that ortholog was also more likely

207 to belong to the low CpG<sub>o/e</sub> peak (**Figure 2B and Supplementary Figure 4**). By contrast,  
208 genes with high CpG<sub>o/e</sub>, were more likely to be species-specific, but if they had an ortholog in  
209 another species, this ortholog was also likely to have high CpG<sub>o/e</sub>. This suggests that genes  
210 that are typically methylated tend to be more conserved across species, which could imply  
211 low evolutionary rates and strong selective pressure. To test this hypothesized relationship  
212 between low CpG<sub>o/e</sub> and low evolutionary rates, we compared the dN/dS values of 1-to-1  
213 orthologous genes belonging to the same CpG<sub>o/e</sub> peak between the two cricket species. We  
214 found that CpG-depleted genes in both crickets had significantly lower dN/dS values than  
215 non-CpG-depleted genes (p-value<0.05; **Figure 2C**), consistent with stronger purifying  
216 selection on CpG-depleted genes.

## 217 **Phylogenetics and gene family expansions**

218 To study the genome evolution of these cricket lineages, we compared the two cricket  
219 genomes with those of 14 additional insects, including members of all major insect lineages  
220 with special emphasis on hemimetabolous species. For each of these 16 insect genomes, we  
221 retrieved the longest protein per gene and grouped them into orthogroups (OGs), which we  
222 called “gene families” for the purpose of this analysis. The OGs containing a single protein  
223 per insect, namely single copy orthologs, were used to infer a phylogenetic tree for these 16  
224 species. The obtained species tree topology was in accordance with the currently understood  
225 insect phylogeny (Misof et al., 2014). Then, we used the Misof et al. (2014) dated phylogeny  
226 to calibrate our tree on four different nodes, which allowed us to estimate that the two  
227 cricket species diverged circa 89.2 million years ago.

228 Our gene family expansion/contraction analysis using 59,516 OGs identified 18 gene families  
229 that were significantly expanded (p-value<0.01) in the lineage leading to crickets. In  
230 addition, we identified a further 34 and 33 gene family expansions specific to *G. bimaculatus*  
231 and *L. kohalensis* respectively. Functional analysis of these expanded gene families  
232 (**Supplementary File 2**) revealed that the cricket-specific gene family expansions included  
233 *pickpocket* genes, which are involved in mechanosensation in *Drosophila melanogaster* as  
234 described in the following section.

235

## 236 **Expansion of *pickpocket* genes**

237 In *D. melanogaster*, the complete *pickpocket* gene repertoire is composed of 6 classes  
238 containing 31 genes. We found cricket orthologs of all 31 *pickpocket* genes across seven of  
239 our OGs, and each OG predominantly contained members of a single *pickpocket* class. We  
240 used all the genes belonging to these 7 OGs to build a *pickpocket* gene tree, using the  
241 predicted *pickpocket* orthologs from 16 insect species (**Figure 3; Supplementary Table 2**).  
242 This gene tree allowed us to classify the different *pickpocket* genes in each of the 16 species.



243 The *pickpocket* gene family appeared to be a significantly expanded gene family in crickets.  
244 Following the classification of *pickpocket* genes used in *Drosophila spp.* (Zelle, Lu, Pyfrom, &  
245 Ben-Shahar, 2013) we determined that the specific gene family expanded in crickets was  
246 *pickpocket* class V (**Figure 3**). In *D. melanogaster* this class contains eight genes: *ppk* (*ppk1*),  
247 *rpk* (*ppk2*), *ppk5*, *ppk8*, *ppk12*, *ppk17*, *ppk26*, and *ppk28* (Zelle et al., 2013). Our analysis  
248 suggests that the class V gene family contains 15 and 14 genes in *G. bimaculatus* and *L.*  
249 *kohalensis* respectively. In contrast, their closest analyzed relative, the locust *Locusta*  
250 *migratoria*, has only five such genes.

251

252 The *pickpocket* genes in crickets tended to be grouped in genomic clusters (**Figure 1B**). For  
253 instance, in *G. bimaculatus* nine of the 15 class V *pickpocket* genes were clustered within a  
254 region of 900Kb, and four other genes appeared in two groups of two. In the *L. kohalensis*  
255 genome, although this genome is more fragmented than that of *G. bimaculatus*  
256 (**Supplementary Table 1**), we observed five clusters containing between two and five genes  
257 each.

258 In *D. melanogaster*, the *pickpocket* gene *ppk1* belongs to class V and is involved in functions  
259 related to stimulus perception and mechanotransduction (Adams et al., 1998). For example,  
260 in larvae, this gene is required for mechanical nociception (Zhong, Hwang, & Tracey, 2010),  
261 and for coordinating rhythmic locomotion (Ainsley et al., 2003). *ppk* is expressed in sensory  
262 neurons that also express the male sexual behavior determiner *fruitless (fru)* (Häsemeyer,  
263 Yapici, Heberlein, & Dickson, 2009; Pavlou & Goodwin, 2013; Rezával et al., 2012).

264 To determine whether *pickpocket* genes in crickets are also expressed in the nervous system,  
265 we checked for evidence of expression of *pickpocket* genes in the publicly available the RNA-  
266 seq libraries for the *G. bimaculatus* prothoracic ganglion (Fisher et al., 2018). This analysis  
267 detected expression (>5 FPKMs) of six *pickpocket* genes, four of them belonging to class V, in  
268 the *G. bimaculatus* nervous system. In the same RNA-seq libraries, we also detected the  
269 expression of *fru* (**Supplementary Table 3**).

270

## 271 **Discussion**

### 272 **The importance of cricket genomes**

273 Most of the crops and livestock that humans eat have been domesticated and subjected to  
274 strong artificial selection for hundreds or even thousands of years to improve their  
275 characteristics most desirable for humans, including size, growth rate, stress resistance, and  
276 organoleptic properties (Y. H. Chen, Gols, & Benrey, 2015; Gepts, 2004; Thrall, Bever, &  
277 Burdon, 2010; Yamasaki et al., 2005). In contrast, to our knowledge, crickets have never been  
278 selected based on any food-related characteristic.

279 The advent of genetic engineering techniques has accelerated domestication of some  
280 organisms (K. Chen & Gao, 2014). These techniques have been used, for instance, to improve  
281 the nutritional value of different crops, or to make them tolerant to pests and climate stress  
282 (Qaim, 2009; Thrall et al., 2010). Crickets are naturally nutritionally rich (Ghosh et al., 2017),  
283 but in principle, their nutritional value could be further improved, for example by increasing  
284 vitamin content or Omega-3 fatty acids proportion. In addition, other issues that present  
285 challenges to cricket farming could potentially be addressed by targeted genome  
286 modification, which can be achieved in *G. bimaculatus* using Zinc finger nucleases, TALENs,  
287 or CRISPR/Cas9 REF. These challenges include sensitivity to common insect viruses,  
288 aggressive behavior resulting in cannibalism, complex mating rituals, and relatively slow  
289 growth rate.

290 An essential tool for any kind of genetic engineering is a high quality annotated reference  
291 genome, together with a deep understanding of the biology of the given species. Because *G.*  
292 *bimaculatus* has been used as a research model in multiple different scientific disciplines,  
293 including rearing for consumption, issues relevant to its biochemical composition (Ghosh et  
294 al., 2017), human health and safety (Ahn et al., 2011; Ryu et al., 2016), putative health  
295 benefits (Ahn et al., 2014; Ahn, Hwang, et al., 2015; Ahn, Kim, et al., 2015; Dong-Hwan et al.,  
296 2004; Hwang et al., 2019; Park et al., 2019), and processing techniques (Dobermann, Field,  
297 & Michaelson, 2019) have been extensively described. Thus, the genome of *G. bimaculatus*  
298 herein described, adds to this body of biological knowledge by providing invaluable  
299 information that will be required to maximize the potential of this cricket to become an  
300 increasingly significant part of the worldwide diet in the future.

301

## 302 **Comparing cricket genomes to other insect genomes**

303 The annotation of these two cricket genomes was done by combining *de novo* gene models,  
304 homology-based methods, and the available RNA-seq and ESTs. This pipeline allowed us to  
305 predict 17,871 genes in the *G. bimaculatus* genome, similar to the number of genes reported  
306 for other hemimetabolous insect genomes including the locust *L. migratoria* (17,307) (X.  
307 Wang et al., 2014) and the termites *Cryptotermes secundus* (18,162) (Harrison et al., 2018),  
308 *Macrotermes natalensis* (16,140) (Poulsen et al., 2014) and *Zootermopsis nevadensis*,  
309 (15,459) (Terrapon et al., 2014). The slightly lower number of protein-coding genes  
310 annotated in *L. kohalensis* (12,767) may be due to the lesser amount of RNA-seq data  
311 available for this species, which challenges gene annotation. Nevertheless, the BUSCO scores  
312 are similar between the two crickets, and the proportion of annotated proteins with putative  
313 orthologous genes in other species (proteins with significant BLAST hits; see methods) for *L.*  
314 *kohalensis* is higher than for *G. bimaculatus*. This suggests the possibility that we may have  
315 successfully annotated most conserved genes, but that highly derived or species-specific  
316 genes might be missing from our annotations.

317

## 318 **TEs and genome size evolution**

319 Approximately 35% of the genome of both crickets corresponds to repetitive content. This  
320 is substantially less than the 60% reported for the genome of *L. migratoria* (X. Wang et al.,  
321 2014). This locust genome is one of the largest sequenced insect genomes to date (6.5 Gb)  
322 but has a very similar number of annotated genes (17,307) to those we report for crickets.  
323 We hypothesize that the large genome size difference between these orthopteran species is  
324 due to the TE content, which has also been correlated with genome size in multiple eukaryote  
325 species (Chénaïs, Caruso, Hiard, & Casse, 2012; Kidwell, 2002).

326 Furthermore, we hypothesize that the differences in the TE composition between the two  
327 crickets are the result of abundant and independent TE activity since their divergence  
328 around 89.2 Mya. This, together with the absence of evidence for large genome duplication  
329 events in this lineage, leads us to hypothesize that the ancestral orthopteran genome was  
330 shorter than those of the crickets studied here (1.6 Gb for *G. bimaculatus* and 1.59 Gb for *L.*  
331 *kohalensis*) which are in the lowest range of orthopteran genome sizes (Hanrahan &  
332 Johnston, 2011). In summary, we propose that the wide range of genome sizes within  
333 Orthoptera, reaching as high as 8.55 Gb in the locust *Schistocerca gregaria* (Camacho et al.,  
334 2015), is likely due to TE activity since the time of the last orthopteran ancestor.

335 There is a clear tendency of polyneopteran genomes to be much longer than those of the  
336 holometabolous genomes (**Figure 4**). Two currently competing hypotheses are that (1) the  
337 ancestral insect genome was small, and was expanded outside of Holometabola, and (2) the  
338 ancestral insect genome was large, and it was compressed in the Holometabola (Gregory,  
339 2002). Our observations are consistent with the first of these hypotheses.

340 Larger genome size correlates with slower developmental rates in some plants and animals,  
341 which is hypothesized to be due to a slower cell division rate (Gregory, 2002). Thus, one may  
342 speculate that the large proportion of TE-derived DNA in cricket genomes might negatively  
343 impact the developmental rate. If this repetitive DNA proves largely non-functional, then in  
344 principle, the developmental rate, an important factor for insect farming, might eventually  
345 be modifiable with the use of genetic engineering techniques.

346

## 347 **DNA Methylation**

348 Most holometabolan species, including well-studied insects like *D. melanogaster* and  
349 *Tribolium castaneum*, do not perform DNA methylation, or they do it at very low levels (Lyko,  
350 Ramsahoye, & Jaenisch, 2000). The honeybee *A. mellifera* was one of the first insects for  
351 which functional DNA methylation was described (Y. Wang et al., 2006). Although this DNA  
352 modification was initially proposed to be associated with the eusociality of these bees

353 (Elango et al., 2009), subsequent studies showed that DNA methylation is widespread and  
354 present in different insect lineages independently of social behavior (Bewick et al., 2016).  
355 DNA methylation also occurs in other non-insect arthropods (Thomas et al., 2020).

356 While the precise role of DNA methylation in gene expression regulation remains unclear,  
357 our analysis suggests that cricket CpG-depleted genes (putatively hypermethylated genes)  
358 show signs of purifying selection, tend to have orthologs in other insects, and are involved in  
359 basic biological functions related to DNA replication and the regulation of gene expression.  
360 These predicted functions differ from those of the non-CpG depleted genes (putatively  
361 hypomethylated genes), which appear to be involved in signaling pathways, metabolism, and  
362 catabolism. These predicted functional categories may be conserved from crickets over circa  
363 345 million years of evolution, as we also detect the same pattern in the honeybee.

364 Taken together, these observations suggest a potential relationship between DNA  
365 methylation, sequence conservation, and function for many cricket genes. Nevertheless,  
366 based on our data, we cannot determine whether the methylated genes are highly conserved  
367 because they are methylated, or because they perform basic functions that may be regulated  
368 by DNA methylation events. In the cockroach *Blattella germanica*, DNA methyltransferase  
369 enzymes and genes with low CpG<sub>o/e</sub> values show an expression peak during the maternal to  
370 zygotic transition (Ylla, Piulachs, & Belles, 2018). These results in cockroaches, together with  
371 our observations, leads us to speculate that at least in Polyneopteran species, DNA  
372 methylation might contribute to the maternal zygotic transition by regulating essential  
373 genes involved in DNA replication, transcription, and translation.

#### 374 ***pickpocket* gene expansion**

375 The *pickpocket* genes belong to the Degenerin/epithelial Na<sup>+</sup> channel (DEG/ENaC) family,  
376 which were first identified in *Caenorhabditis elegans* as involved in mechanotransduction  
377 (Adams et al., 1998). The same family of ion channels was later found in many multicellular  
378 animals, with a diverse range of functions related to mechanoreception and fluid–electrolyte  
379 homeostasis (Liu, Johnson, & Welsh, 2003). Most of the information on their roles in insects  
380 comes from studies in *D. melanogaster*. In this fruit fly, *pickpocket* genes are involved in  
381 neural functions including NaCl taste (Lee et al., 2017), pheromone detection (Averhoff,  
382 Richardson, Starostina, Kinser, & Pikielny, 1976), courtship behavior (Lu, LaMora, Sun,  
383 Welsh, & Ben-Shahar, 2012), and liquid clearance in the larval trachea (Liu et al., 2003).

384 In *D. melanogaster* adults, the abdominal ganglia mediate courtship and postmating  
385 behaviors through neurons expressing *ppk* and *fru* (Häsemeyer et al., 2009; Pavlou &  
386 Goodwin, 2013; Rezával et al., 2012). In *D. melanogaster* larvae, *ppk* expression in dendritic  
387 neurons is required to control the coordination of rhythmic locomotion (Ainsley et al., 2003).  
388 In crickets, the abdominal ganglia are responsible for determining song rhythm (Jacob &  
389 Hedwig, 2016). Moreover, we find that in *G. bimaculatus*, both *ppk* and *fru* gene expression  
390 are detectable in the adult prothoracic ganglion. These observations suggest the possibility

391 that class V *pickpocket* genes could be involved in song rhythm determination in crickets  
392 through their expression in abdominal ganglia.

393 This possibility is consistent with the results of multiple quantitative trait locus (QTL)  
394 studies done in cricket species from the genus *Laupala*, which identified genomic regions  
395 associated with mating song rhythm variations and female acoustic preference (Blankers,  
396 Oh, & Shaw, 2018). The 179 scaffolds that the authors reported being within one LOD of the  
397 seven QTL peaks, contained five *pickpocket* genes, three of them from class V and two from  
398 class IV. One of the two class IV genes also appears within a QTL peak of a second experiment  
399 (Blankers, Oh, Bombarely, et al., 2018; Shaw & Lesnick, 2009). Xu and Shaw (2019) found  
400 that a scaffold in a region of LOD score 1.5 of one of their minor linkage groups (LG3) contains  
401 *slowpoke*, a gene that affects song interpulse interval in *D. melanogaster*, and this scaffold  
402 also contains two class III *pickpocket* genes (**Supplementary Table 4**).

403 In summary, the roles of *pickpocket* genes in controlling rhythmic locomotion, courtship  
404 behavior, and pheromone detection in *D. melanogaster*, their appearance in genomic regions  
405 associated with song rhythm variation in *Laupala*, and their expression in *G. bimaculatus*  
406 abdominal ganglia, lead us to speculate that the expanded *pickpocket* gene family in cricket  
407 genomes could be playing a role in regulating rhythmic wing movements and sound  
408 perception, both of which are necessary for mating (Wilson Horch et al., 2017). We note that  
409 Xu and Shaw (2019) hypothesized that song production in crickets is likely to be regulated  
410 by ion channels, and that locomotion, neural modulation, and muscle development are all  
411 involved in singing (Xu & Shaw, 2019). However, further experiments, which could take  
412 advantage of the existing RNAi and genome modification protocols for *G. bimaculatus*  
413 (Kulkarni & Extavour, 2019), will be required to test this hypothesis.

414

415 In conclusion, the *G. bimaculatus* genome assembly and annotation presented here is a  
416 source of information and an essential tool that we anticipate will enhance the status of this  
417 cricket as a modern functional genetics research model. This genome may also prove useful  
418 to the agricultural sector, and could allow improvement of cricket nutritional value,  
419 productivity, and reduction of allergen content. Annotating a second cricket genome, that of  
420 *L. kohalensis*, and comparing the two genomes, allowed us to unveil possible  
421 synapomorphies of cricket genomes, and to suggest potentially general evolutionary trends  
422 of insect genomes.

423

## 424 **Materials and Methods**

### 425 **DNA isolation**

426 The *G. bimaculatus* white-eyed mutant strain was reared at Tokushima University, at 29±1  
427 °C and 30-50% humidity under a 10-h light, 14-h dark photoperiod. Testes of a single male  
428 adult of the *G. bimaculatus* white-eyed mutant strain were used for DNA isolation and short-  
429 read sequencing. We used DNA from testes of an additional single individual to make a long  
430 read PacBio sequencing library to close gaps in the genome assembly.

### 431 **Genome Assembly**

432 Paired-end libraries were generated with insert sizes of 375 and 500 bp, and mate-pair  
433 library were generated with insert sizes of 3, 5, 10, and 20kb. Libraries were sequenced using  
434 the Illumina HiSeq 2000 and HiSeq 2500 sequencing platforms. This yielded a total of 127.4  
435 Gb of short read paired-end data, that was subsequently assembled using the *de novo*  
436 assembler Platanus (v. 1.2.1) (Kajitani et al., 2014). Scaffolding and gap closing were  
437 performed using total 138.2 Gb of mate-pair data. A further gap closing step was performed  
438 using long reads generated by the PacBio RS system. The 4.3 Gb of PacBio subread data were  
439 used to fill gaps in the assembly using PBJelly (v. 15.8.24) (English et al., 2012).

440

### 441 **Repetitive Content Masking**

442 We generated a custom repeat library for each of the two cricket genomes by combining the  
443 outputs from homology-based and *de novo* repeat identifiers, including the LTRdigest  
444 together with LTRharvest (Ellinghaus, Kurtz, & Willhoeft, 2008),  
445 RepeatModeler/RepeatClassifier ([www.repeatmasker.org/RepeatModeler](http://www.repeatmasker.org/RepeatModeler)), MITE tracker  
446 (Crescente, Zavallo, Helguera, & Vanzetti, 2018), TransposonPSI  
447 (<http://transposonpsi.sourceforge.net>), and the databases SINEBase (Vassetzky &  
448 Kramerov, 2013) and RepBase (Bao, Kojima, & Kohany, 2015). We removed redundancies  
449 from the library by merging sequences that were greater than 80% similar with usearch  
450 (Robert C. Edgar, 2010), and classified them with RepeatClassifier. Sequences classified as  
451 “unknown” were BLASTed (BLASTX) against the 9,229 reviewed proteins of insects from  
452 UniProtKB/Swiss-Prot. Those sequences with a BLAST hit (E-value < 1e-10) against a  
453 protein not annotated as a transposase, transposable element, copia protein, or transposon  
454 were removed from the custom repeat library. The custom repeat library was provided to  
455 RepeatMasker version open-4.0.5 to generate the repetitive content reports, and to the  
456 MAKER2 pipeline to mask the genome.

## 457 **Protein-Coding Genes Annotation**

458 We performed genome annotations through three iterations of the MAKER2 (v2.31.8)  
459 pipeline (Holt & Yandell, 2011) combining *ab-initio* gene models and evidence-based models.  
460 For the *G. bimaculatus* genome annotation, we provided the MAKER2 pipeline with the  
461 43,595 *G. bimaculatus* nucleotide sequences from NCBI, an assembled developmental  
462 transcriptome (Zeng et al., 2013), an assembled prothoracic ganglion transcriptome (Fisher  
463 et al., 2018), and a genome-guided transcriptome generated with StringTie (Pertea et al.,  
464 2015) using 84 RNA-seq libraries (accession numbers: XXXX) mapped to the genome with  
465 HISAT2 (Kim, Langmead, & Salzberg, 2015). As alternative ESTs and protein sequences, we  
466 provided MAKER2 with 14,391 nucleotide sequences from *L. kohalensis* available at NCBI,  
467 and an insect protein database obtained from UniProtKB/Swiss-Prot (UniProt, 2019).

468 For the annotation of the *L. kohalensis* genome, we ran the MAKER2 pipeline with the 14,391  
469 *L. kohalensis* nucleotide sequences from NCBI, the assembled *G. bimaculatus* developmental  
470 and prothoracic ganglion transcriptomes described above, and the 43,595 NCBI nucleotide  
471 sequences. As protein databases, we provided the insect proteins from UniProtKB/Swiss-  
472 Prot plus the proteins that we annotated in the *G. bimaculatus* genome.

473 For both crickets, we generated *ab-initio* gene models with GeneMark-ES (Ter-  
474 Hovhannisyanyan, Lomsadze, Chernoff, & Borodovsky, 2008) in self-training mode, and with  
475 Augustus (Stanke & Waack, 2003) trained with BUSCO v3 (Simão et al., 2015). After each of  
476 the first two MAKER2 iterations, additional gene models were obtained with SNAP (Korf,  
477 2004) trained with the annotated genes.

478 Functional annotations were obtained using InterProScan (Jones et al., 2014), which  
479 retrieved the InterProDomains, PFAM domains, and GO-terms. Additionally, we ran a series  
480 of BLAST rounds to assign a descriptor to each transcript based on the best BLAST hit. The  
481 first round of BLAST was against the reviewed insect proteins from UniProtKB/Swiss-Prot.  
482 Proteins with no significant BLAST hits (E-value < 1e-6) were later BLASTed against all  
483 proteins from UniProtKB/TrEMBL, and those without a hit with E-value < 1e-6 were BLASTed  
484 against all proteins from UniProtKB/Swiss-Prot.

485 A detailed pipeline scheme is available in **Supplementary Figures 1 & 2**, and the  
486 annotation scripts are available on GitHub  
487 ([https://github.com/guillemylla/Crickets\\_Genome\\_Annotation](https://github.com/guillemylla/Crickets_Genome_Annotation)).

488

## 489 **Quality Assessment**

490 Genome assembly statistics were obtained with assembly-stats ([https://github.com/sanger-](https://github.com/sanger-pathogens/assembly-stats)  
491 [pathogens/assembly-stats](https://github.com/sanger-pathogens/assembly-stats)). BUSCO (v3.1.0) (Simão et al., 2015) was used to assess the level

492 of completeness of the genome assemblies ('-m geno') as well as that of the gene annotations  
493 ('-m tran') at both arthropod ('arthropoda\_odb9') and insect ('insecta\_odb9') levels.

## 494 **CpG<sub>o/e</sub> Analysis**

495 We used the genome assemblies and their gene annotations from this study for the two  
496 cricket species, and retrieved publicly available annotated genomes from the other 14 insect  
497 species (**Supplementary Table 1**). The gene annotation files (in gff format) were used to  
498 obtain the amino-acid and CDS sequences for each annotated protein-coding gene per  
499 genome using gffread, with options "-y" and "-x" respectively. The CpG<sub>o/e</sub> value per gene was  
500 computed as the observed frequency of CpGs ( $f_{\text{CpG}}$ ) divided by the product of C and G  
501 frequencies ( $f_C$  and  $f_G$ )  $f_{\text{CpG}}/f_C*f_G$  in the longest CDS per gene for each of the 16 studied insects.  
502 CpG<sub>o/e</sub> values larger than zero and smaller than two were retained and represented as  
503 density plots (**Figures 2 & 4**).

504 The distributions of gene CpG<sub>o/e</sub> values per gene of the two crickets and the honeybee *A.*  
505 *mellifera* were fitted with a mixture of normal distributions using the mixtools R package  
506 (Benaglia, Chauveau, Hunter, & Young, 2009). This allowed us to obtain the mean of each  
507 distribution, the standard errors, and the interception point between the two distributions,  
508 which was used to categorize the genes into low CpG<sub>o/e</sub> and high CpG<sub>o/e</sub> bins. For these two  
509 bins of genes, we performed a GO-enrichment analysis (based on GO-terms previously  
510 obtained using InterProScan) of Biological Process terms using the TopGO package (Alexa &  
511 Rahnenfuhrer, 2019) with the weight01 algorithm and the Fisher statistic. GO-terms with a  
512 p-value<0.05 were plotted as word-clouds using the R package ggwordcloud (Pennec &  
513 Slowikowski, 2018) with the size of the word correlated with the proportion of the term  
514 within the set.

515 For each of the genes belonging to low and high CpG<sub>o/e</sub> categories in each of the three insect  
516 species, we retrieved their orthogroup identifier from our gene family analysis, allowing us  
517 to assign putative methylation status to orthogroups in each insect. Then we used the UpSet  
518 R package (Lex, Gehlenborg, Strobel, Vuillemot, & Pfister, 2014) to compute and display the  
519 number of orthogroups exclusive to each combination as an UpSet plot.

## 520 **dN/dS Analysis**

521 We first aligned the longest predicted protein product of the single-copy-orthologs of all  
522 protein-coding genes between the two crickets (N=5,728) with MUSCLE. Then, the amino-  
523 acid alignments were transformed into codon-based nucleotide alignments using the  
524 Pal2Nal software (Suyama, Torrents, & Bork, 2006). The resulting codon-based nucleotide  
525 alignments were used to calculate the pairwise dN/dS for each gene pair with the yn00  
526 algorithm implemented in the PAML package (Yang, 2007). Genes with dN or dS >2 were  
527 discarded from further analysis. The Wilcoxon-Mann-Whitney statistical test was used to  
528 compare the dN/dS values between genes with high and low CpG<sub>o/e</sub> values in both insects.



## 529 **Gene Family Expansions and Contractions**

530 Using custom Python scripts (see  
531 [https://github.com/guillemylla/Crickets\\_Genome\\_Annotation](https://github.com/guillemylla/Crickets_Genome_Annotation)) we obtained the longest  
532 predicted protein product per gene in each of the 16 studied insect species and grouped them  
533 into orthogroups (which we also refer to herein as “gene families”) using OrthoFinder v2.3.3  
534 (Emms & Kelly, 2019). The orthogroups (OGs) determined by OrthoFinder that contained a  
535 single gene per insect, namely putative one-to-one orthologs, were used for phylogenetic  
536 reconstruction. The proteins within each orthogroup were aligned with MUSCLE (Robert C  
537 Edgar, 2004) and the alignments trimmed with GBlocks (Castresana, 2000). The trimmed  
538 alignments were concatenated into a single meta-alignment that was used to infer the  
539 species tree with FastTree2 (Price, Dehal, & Arkin, 2010).

540 To calibrate the species tree, we used the “chronos” function from the R package ape v5.3  
541 (Paradis & Schliep, 2019), setting the common node between Blattodea and Orthoptera at  
542 248 million years (my), the origin of Holometabola at 345 my, the common node between  
543 Hemiptera and Thysanoptera at 339 my, and the ancestor of hemimetabolous and  
544 holometabolous insects (root of the tree) at between 385 and 395 my. These time points  
545 were obtained from a phylogeny published that was calibrated with several fossils (Misof et  
546 al., 2014).

547 The gene family expansion/contraction analysis was done with the CAFE software (De Bie,  
548 Cristianini, Demuth, & Hahn, 2006). We ran CAFE using the calibrated species tree and the  
549 table generated by OrthoFinder with the number of genes belonging to each orthogroup in  
550 each insect. Following the CAFE manual, we first calculated the birth-death parameters with  
551 the orthogroups having less than 100 genes. We then corrected them by assembly quality  
552 and calculated the gene expansions and contractions for both large (>100 genes) and small  
553 ( $\leq 100$ ) gene families. This allowed us to identify gene families that underwent a significant  
554 ( $p$ -value<0.01) gene family expansion or contraction on each branch of the tree. We  
555 proceeded to obtain functional information from those families expanded on our branches  
556 of interest (i.e. the origin of Orthoptera, the branch leading to crickets, and the branches  
557 specific to each cricket species.). To functionally annotate the orthogroups of interest, we  
558 first obtained the *D. melanogaster* identifiers of the proteins within each orthogroup, and  
559 retrieved the FlyBase Symbol and the FlyBase gene summary per gene using the FlyBase API  
560 (Thurmond et al., 2019). Additionally, we ran InterProScan on all the proteins of each  
561 orthogroup and retrieved all PFAM motifs and the GO terms together with their descriptors.  
562 All of this information was summarized in tabulated files (**Supplementary File 2**), which we  
563 used to identify gene expansions with potentially relevant functions for insect evolution.

### 564 ***pickpocket* gene family expansion**

565 The functional annotation of significantly expanded gene families in crickets allowed us to  
566 identify an orthogroup containing orthologs of *D. melanogaster pickpocket* class V genes.

567 Subsequently, we retrieved the 6 additional orthogroups containing the complete set of  
568 *pickpocket* genes in *D. melanogaster* according to FlyBase. The protein sequences of the  
569 members of the 7 Pickpocket orthogroups were aligned with MUSCLE, and the *pickpocket*  
570 gene tree obtained with FastTree. Following the *pickpocket* categorization described for  
571 *Drosophila spp.* (Zelle et al., 2013) and the obtained *pickpocket* gene tree, we classified the  
572 crickets *pickpocket* genes into classes from I to VI.

573 To check for evidence of expression *pickpocket* genes in the cricket nervous system, we used  
574 the 22 RNA-seq libraries from prothoracic ganglion (Fisher et al., 2018) of *G. bimaculatus*  
575 available at NCBI GEO (PRJNA376023). Reads were mapped against the *G. bimaculatus*  
576 genome with RSEM (Li & Dewey, 2011) using STAR (Dobin et al., 2013) as the mapping  
577 algorithm, and the number of expected counts and FPKMs was retrieved for each gene in  
578 each library. The FPKMs of the *pickpocket* genes and *fruitless* is shown in **Supplementary**  
579 **Table 3**. Genes with a sum of more than five FPKMs across all samples were considered to  
580 be expressed in *G. bimaculatus* prothoracic ganglion.

## 581 **Acknowledgments**

582 This work was supported by Harvard University and MEXT KAKENHI (No. 221S0002;  
583 26292176; 17H03945). The computational infrastructure in the cloud used for the genome  
584 analysis was funded by AWS Cloud Credits for Research. The authors are grateful to Hiroo  
585 Saihara for his support in management of a genome data server at Tokushima University.

## 586 **Author contributions statement**

587 GY, SN, TM and CE designed experiments; TI and AT conducted sequencing by HiSeq and  
588 assembling short reads using the Platanus assembler; ST, YI, TW, MF and YM performed DNA  
589 isolation, gap closing of contigs and manual annotation; GY, TN, ST and TB conducted all  
590 other experiments and analyses; TM and CE funded the project; GY and CE wrote the paper  
591 with input from all authors.

## 592 **Data availability**

593 The genome assembly and gene annotations for *Gryllus bimaculatus* were submitted to DDBJ  
594 and to NCBI under the accession number (XXXXXX). The scripts used for genome annotation  
595 and analysis are available at GitHub  
596 ([https://github.com/guillemylla/Crickets\\_Genome\\_Annotation](https://github.com/guillemylla/Crickets_Genome_Annotation)).).

597

## 598 References

599

- 600 Adams, C. M., Anderson, M. G., Motto, D. G., Price, M. P., Johnson, W. A., & Welsh, M. J. (1998).  
601 Ripped pocket and pickpocket, novel *Drosophila* DEG/ENaC subunits expressed in  
602 early development and in mechanosensory neurons. In *The Journal of Cell Biology*  
603 (Vol. 140, pp. 143-152).
- 604 Ahn, M. Y., Han, J. W., Hwang, J. S., Yun, E. Y., & Lee, B. M. (2014). Anti-inflammatory effect of  
605 glycosaminoglycan derived from *Gryllus bimaculatus* (A type of cricket, insect) on  
606 adjuvant-treated chronic arthritis rat model. In *Journal of Toxicology and*  
607 *Environmental Health - Part A: Current Issues* (Vol. 77, pp. 1332-1345).
- 608 Ahn, M. Y., Han, J. W., Kim, S. J., Hwang, J. S., & Yun, E. Y. (2011). Thirteen-week oral dose  
609 toxicity study of *G. bimaculatus* in sprague-dawley rats. In *Toxicological Research*  
610 (Vol. 27, pp. 231-240).
- 611 Ahn, M. Y., Hwang, J. S., Yun, E. Y., Kim, M. J., & Park, K. K. (2015). Anti-aging effect and gene  
612 expression profiling of aged rats treated with *G. bimaculatus* extract. In *Toxicological*  
613 *Research* (Vol. 31, pp. 173-180).
- 614 Ahn, M. Y., Kim, M. J., Kwon, R. H., Hwang, J. S., & Park, K. K. (2015). Gene expression  
615 profiling and inhibition of adipose tissue accumulation of *G. bimaculatus* extract in  
616 rats on high fat diet. In *Lipids in Health and Disease* (Vol. 14, pp. 116).
- 617 Ainsley, J. A., Pettus, J. M., Bosenko, D., Gerstein, C. E., Zinkevich, N., Anderson, M. G., . . .  
618 Johnson, W. A. (2003). Enhanced Locomotion Caused by Loss of the *Drosophila*  
619 DEG/ENaC Protein Pickpocket1. In *Current Biology* (Vol. 13, pp. 1557-1563).
- 620 Alexa, A., & Rahnenfuhrer, J. (2019). topGO: Enrichment Analysis for Gene Ontology. *R*  
621 *package version 2.36.0*.
- 622 Averhoff, W. W., Richardson, R. H., Starostina, E., Kinser, R. D., & Pikielny, C. W. (1976).  
623 Multiple pheromone system controlling mating in *Drosophila melanogaster*. In  
624 *Proceedings of the National Academy of Sciences of the United States of America* (Vol.  
625 73, pp. 591-593).
- 626 Bao, W., Kojima, K. K., & Kohany, O. (2015). Repbase Update, a database of repetitive  
627 elements in eukaryotic genomes. In *Mobile DNA* (Vol. 6, pp. 11).
- 628 Benaglia, T., Chauveau, D., Hunter, D. R., & Young, D. S. (2009). Mixtools: An R package for  
629 analyzing finite mixture models. In *Journal of Statistical Software* (Vol. 32, pp. 1-29).
- 630 Bewick, A. J., Vogel, K. J., Moore, A. J., & Schmitz, R. J. (2016). Evolution of DNA Methylation  
631 across Insects. In *Molecular Biology and Evolution* (Vol. 34, pp. 654-665).
- 632 Bird, A. P. (1980). DNA methylation and the frequency of CpG in animal DNA. In *Nucleic*  
633 *Acids Research* (Vol. 8, pp. 1499-1504).
- 634 Blankers, T., Oh, K. P., Bombarely, A., & Shaw, K. L. (2018). The genomic architecture of a  
635 rapid Island radiation: Recombination rate variation, chromosome structure, and  
636 genome assembly of the hawaiian cricket *Laupala*. In *Genetics* (Vol. 209, pp. 1329-  
637 1344).
- 638 Blankers, T., Oh, K. P., & Shaw, K. L. (2018). The genetics of a behavioral speciation  
639 phenotype in an Island system. In *Genes* (Vol. 9, pp. 346).
- 640 Camacho, J. P. M. M., Ruiz-Ruano, F. J., Martín-Blázquez, R., López-León, M. D., Cabrero, J.,  
641 Lorite, P., . . . Bakkali, M. (2015). A step to the gigantic genome of the desert locust:  
642 chromosome sizes and repeated DNAs. In *Chromosoma* (Vol. 124, pp. 263-275).
- 643 Castresana, J. (2000). Selection of Conserved Blocks from Multiple Alignments for Their Use  
644 in Phylogenetic Analysis. In *Molecular Biology and Evolution* (Vol. 17, pp. 540-552).
- 645 Chen, K., & Gao, C. (2014). Targeted genome modification technologies and their  
646 applications in crop improvements. *Plant Cell Reports*, 33(4), 575-583.
- 647 Chen, Y. H., Gols, R., & Benrey, B. (2015). Crop domestication and its impact on naturally  
648 selected trophic interactions. *Annu Rev Entomol*, 60, 35-58.
- 649 Chénais, B., Caruso, A., Hiard, S., & Casse, N. (2012). The impact of transposable elements on  
650 eukaryotic genomes: From genome size increase to genetic adaptation to stressful  
651 environments. In *Gene* (Vol. 509, pp. 7-15).
- 652 Crescente, J. M., Zavallo, D., Helguera, M., & Vanzetti, L. S. (2018). MITE Tracker: an accurate  
653 approach to identify miniature inverted-repeat transposable elements in large  
654 genomes. In *BMC Bioinformatics* (Vol. 19, pp. 348).
- 655 De Bie, T., Cristianini, N., Demuth, J. P., & Hahn, M. W. (2006). CAFE: a computational tool  
656 for the study of gene family evolution. In *Bioinformatics* (Vol. 22, pp. 1269-1271).

- 657 Dobermann, D., Field, L. M., & Michaelson, L. V. (2019). Impact of heat processing on the  
658 nutritional content of *Gryllus bimaculatus* (black cricket). In *Nutrition Bulletin* (Vol.  
659 44, pp. 116-122).
- 660 Dobin, A., Davis, C. A., Schlesinger, F., Drenkow, J., Zaleski, C., Jha, S., . . . Gingeras, T. R.  
661 (2013). STAR: ultrafast universal RNA-seq aligner. In *Bioinformatics* (Vol. 29, pp. 15-  
662 21).
- 663 Dong-Hwan, S., HWANG, S.-Y., HAN, J., KOH, S.-K., KIM, I., RYU, K. S., & YUN, C.-Y. (2004).  
664 Immune-Enhancing Activity Screening on Extracts from Two Crickets, *Gryllus*  
665 *bimaculatus* and *Teleogryllus emma*. In *Entomological Research* (Vol. 34, pp. 207-  
666 211).
- 667 Donoughe, S., & Extavour, C. G. (2015). Embryonic development of the cricket *Gryllus*  
668 *bimaculatus*. In *Developmental Biology* (Vol. 411, pp. 140-156).
- 669 Edgar, R. C. (2004). MUSCLE: multiple sequence alignment with high accuracy and high  
670 throughput. In *Nucleic Acids Research* (Vol. 32, pp. 1792-1797).
- 671 Edgar, R. C. (2010). Search and clustering orders of magnitude faster than BLAST. In  
672 *Bioinformatics* (Vol. 26, pp. 2460-2461).
- 673 Elango, N., Hunt, B. G., Goodisman, M. A. D., & Yi, S. V. (2009). DNA methylation is  
674 widespread and associated with differential gene expression in castes of the  
675 honeybee, *Apis mellifera*. In *Proceedings of the National Academy of Sciences of the*  
676 *United States of America* (Vol. 106, pp. 11206-11211).
- 677 Ellinghaus, D., Kurtz, S., & Willhoeft, U. (2008). LTRharvest, an efficient and flexible  
678 software for de novo detection of LTR retrotransposons. In *BMC Bioinformatics* (Vol.  
679 9, pp. 18).
- 680 Emms, D. M., & Kelly, S. (2019). OrthoFinder: phylogenetic orthology inference for  
681 comparative genomics. *Genome Biol*, 20(1), 238.
- 682 English, A. C., Richards, S., Han, Y., Wang, M., Vee, V., Qu, J., . . . Gibbs, R. A. (2012). Mind the  
683 gap: upgrading genomes with Pacific Biosciences RS long-read sequencing  
684 technology. *PLoS One*, 7(11), e47768.
- 685 Fisher, H. P., Pascual, M. G., Jimenez, S. I., Michaelson, D. A., Joncas, C. T., Quenzer, E. D.,  
686 Christie, A.E. & Horch, H. W. (2018). De novo assembly of a transcriptome for the  
687 cricket *Gryllus bimaculatus* prothoracic ganglion: An invertebrate model for  
688 investigating adult central nervous system compensatory plasticity. *PLoS One* (Vol.  
689 13, pp. e0199070).
- 690 Gepts, P. (2004). Crop domestication as a long-term selection experiment. *Plant breeding*  
691 *reviews*, 24(2), 1-44.
- 692 Ghosh, S., Lee, S.-M., Jung, C., & Meyer-Rochow, V. (2017). Nutritional composition of five  
693 commercial edible insects in South Korea. *Journal of Asia-Pacific Entomology*, 20(2),  
694 686-694.
- 695 Gregory, T. R. (2002). Genome size and developmental complexity. *Genetica*, 115(1), 131-  
696 146.
- 697 Hanboonsong, Y., Jamjanya, T., & Durst, P. B. (2013). Six-legged livestock : edible insect  
698 farming , collecting and marketing in Thailand. In *Office* (pp. 69).
- 699 Hanrahan, S. J., & Johnston, J. S. (2011). New genome size estimates of 134 species of  
700 arthropods. In *Chromosome research : an international journal on the molecular,*  
701 *supramolecular and evolutionary aspects of chromosome biology* (Vol. 19, pp. 809-  
702 823).
- 703 Harrison, M. C., Jongepier, E., Robertson, H. M., Arning, N., Bitard-Feildel, T., Chao, H., . . .  
704 Bornberg-Bauer, E. (2018). Hemimetabolous genomes reveal molecular basis of  
705 termite eusociality. *Nature ecology & evolution*.
- 706 Häsemeyer, M., Yapici, N., Heberlein, U., & Dickson, B. J. (2009). Sensory Neurons in the  
707 *Drosophila* Genital Tract Regulate Female Reproductive Behavior. In *Neuron* (Vol.  
708 61, pp. 511-518).
- 709 Holt, C., & Yandell, M. (2011). MAKER2: an annotation pipeline and genome-database  
710 management tool for second-generation genome projects. In *BMC Bioinformatics*  
711 (Vol. 12, pp. 491).
- 712 Huber, F., Moore, T. E. T. E., & Loher, W. (1989). Cricket behavior and neurobiology. 565.
- 713 Hwang, B. B., Chang, M. H., Lee, J. H., Heo, W., Kim, J. K., Pan, J. H., . . . Kim, J. H. (2019). The  
714 edible insect *Gryllus bimaculatus* protects against gut-derived inflammatory  
715 responses and liver damage in mice after acute alcohol exposure. In *Nutrients* (Vol.  
716 11, pp. 857).

- 717 Jacob, P. F., & Hedwig, B. (2016). Acoustic signalling for mate attraction in crickets:  
718 Abdominal ganglia control the timing of the calling song pattern. In *Behavioural*  
719 *Brain Research* (Vol. 309, pp. 51-66).
- 720 Jones, P., Binns, D., Chang, H.-Y., Fraser, M., Li, W., McAnulla, C., . . . Hunter, S. (2014).  
721 InterProScan 5: Genome-scale Protein Function Classification. In *Bioinformatics* (pp.  
722 1-5).
- 723 Kainz, F., Ewen-Campen, B., Akam, M., & Extavour, C. G. (2011). Notch/Delta signalling is  
724 not required for segment generation in the basally branching insect *Gryllus*  
725 *bimaculatus*. *Development*, *138*(22), 5015-5026.
- 726 Kajitani, R., Toshimoto, K., Noguchi, H., Toyoda, A., Ogura, Y., Okuno, M., . . . Itoh, T. (2014).  
727 Efficient de novo assembly of highly heterozygous genomes from whole-genome  
728 shotgun short reads. *Genome Res*, *24*(8), 1384-1395.
- 729 Kidwell, M. G. (2002). Transposable elements and the evolution of genome size in  
730 eukaryotes. In *Genetica* (Vol. 115, pp. 49-63).
- 731 Kim, D., Langmead, B., & Salzberg, S. L. (2015). HISAT: A fast spliced aligner with low  
732 memory requirements. *Nature Methods*.
- 733 Korf, I. (2004). Gene finding in novel genomes. In *BMC Bioinformatics* (Vol. 5, pp. 59).
- 734 Kouřimská, L., & Adámková, A. (2016). Nutritional and sensory quality of edible insects. In  
735 *NFS Journal* (Vol. 4, pp. 22-26).
- 736 Kulkarni, A., & Extavour, C. G. (2019). The Cricket *Gryllus bimaculatus*: Techniques for  
737 Quantitative and Functional Genetic Analyses of Cricket Biology. In *Evo-Devo: Non-*  
738 *model Species in Cell and Developmental Biology* (Vol. 68, pp. 183-216): Springer.
- 739 Lee, M. J., Sung, H. Y., Jo, H., Kim, H.-W., Choi, M. S., Kwon, J. Y., & Kang, K. (2017). Iontropic  
740 Receptor 76b Is Required for Gustatory Aversion to Excessive Na<sup>+</sup> in *Drosophila*. In  
741 *Molecules and cells* (Vol. 40, pp. 787-795).
- 742 Lex, A., Gehlenborg, N., Strobel, H., Vuilleumot, R., & Pfister, H. (2014). UpSet: Visualization  
743 of intersecting sets. In *IEEE Transactions on Visualization and Computer Graphics*  
744 (Vol. 20, pp. 1983-1992).
- 745 Li, B., & Dewey, C. N. (2011). RSEM: accurate transcript quantification from RNA-Seq data  
746 with or without a reference genome. In *BMC Bioinformatics* (Vol. 12, pp. 323).
- 747 Liu, L., Johnson, W. A., & Welsh, M. J. (2003). *Drosophila* DEG/ENaC pickpocket genes are  
748 expressed in the tracheal system, where they may be involved in liquid clearance. In  
749 *Proceedings of the National Academy of Sciences of the United States of America* (Vol.  
750 100, pp. 2128-2133).
- 751 Lu, B., LaMora, A., Sun, Y., Welsh, M. J., & Ben-Shahar, Y. (2012). ppk23-Dependent  
752 Chemosensory Functions Contribute to Courtship Behavior in *Drosophila*  
753 *melanogaster*. In M. B. Goodman (Ed.), *PLoS Genetics* (Vol. 8, pp. e1002587).
- 754 Lyko, F., Ramsahoye, B. H., & Jaenisch, R. (2000). DNA methylation in *Drosophila*  
755 *melanogaster*. *Nature*, *408*, 538-540.
- 756 Mi, Y. A., Hye, J. B., In, S. K., Eun, J. Y., Seung, J. K., Hyung, S. K., . . . Byung, M. L. (2005).  
757 Genotoxic evaluation of the biocomponents of the cricket, *Gryllus bimaculatus*, using  
758 three mutagenicity tests. In *Journal of Toxicology and Environmental Health - Part A*  
759 (Vol. 68, pp. 2111-2118).
- 760 Misof, B., Liu, S., Meusemann, K., Peters, R. S., Donath, A., Mayer, C., . . . Zhou, X. (2014).  
761 Phylogenomics resolves the timing and pattern of insect evolution. In *Science* (Vol.  
762 346, pp. 763-767).
- 763 Mito, T., & Noji, S. (2008). The Two-Spotted Cricket *Gryllus bimaculatus*: An Emerging  
764 Model for Developmental and Regeneration Studies. In *CSH protocols* (Vol. 2008, pp.  
765 pdb.emo110).
- 766 Paradis, E., & Schliep, K. (2019). Ape 5.0: An environment for modern phylogenetics and  
767 evolutionary analyses in R. In R. Schwartz (Ed.), *Bioinformatics* (Vol. 35, pp. 526-  
768 528).
- 769 Park, S. A., Lee, G. H., Lee, H. Y., Hoang, T. H., & Chae, H. J. (2019). Glucose-lowering effect of  
770 *Gryllus bimaculatus* powder on streptozotocin-induced diabetes through the  
771 AKT/mTOR pathway. In *Food Science and Nutrition* (Vol. 8, pp. 402-409).
- 772 Pavlou, H. J., & Goodwin, S. F. (2013). Courtship behavior in *Drosophila melanogaster*:  
773 towards a 'courtship connectome'. In *Current opinion in neurobiology* (Vol. 23, pp.  
774 76-83).
- 775 Allergy to Crickets: A Review, 25 91-95 (2016).
- 776 Pennec, E., & Slowikowski, K. (2018). ggwordcloud: A Word Cloud Geom for 'ggplot2'. R  
777 package version 0.5.0. URL <https://cran.r-project.org/package=ggwordcloud>.

- 778 Perteua, M., Perteua, G. M., Antonescu, C. M., Chang, T.-C., Mendell, J. T., & Salzberg, S. L.  
779 (2015). StringTie enables improved reconstruction of a transcriptome from RNA-  
780 seq reads. In *Nature Biotechnology* (Vol. 33, pp. 290-295).
- 781 Poulsen, M., Hu, H., Li, C., Chen, Z., Xu, L., Otani, S., . . . Zhang, G. (2014). Complementary  
782 symbiont contributions to plant decomposition in a fungus-farming termite. In  
783 *Proceedings of the National Academy of Sciences of the United States of America* (Vol.  
784 111, pp. 14500-14505).
- 785 Price, M. N., Dehal, P. S., & Arkin, A. P. (2010). FastTree 2 – Approximately Maximum-  
786 Likelihood Trees for Large Alignments. In A. F. Y. Poon (Ed.), *PLoS One* (Vol. 5, pp.  
787 e9490).
- 788 Qaim, M. (2009). The Economics of Genetically Modified Crops. *Annual Review of Resource*  
789 *Economics*, 1(1), 665-694.
- 790 Rezával, C., Pavlou, H. J., Dornan, A. J., Chan, Y.-B., Kravitz, E. A., & Goodwin, S. F. (2012).  
791 Neural circuitry underlying *Drosophila* female postmating behavioral responses. In  
792 *Current Biology* (Vol. 22, pp. 1155-1165).
- 793 Allergic risks of consuming edible insects: A systematic review, 62 1700030 (2018).
- 794 Ryu, H. Y., Lee, S., Ahn, K. S., Kim, H. J., Lee, S. S., Ko, H. J., . . . Song, K. S. (2016). Oral toxicity  
795 study and skin sensitization test of a cricket. In *Toxicological Research* (Vol. 32, pp.  
796 159-173).
- 797 Shaw, K. L., & Lesnick, S. C. (2009). Genomic linkage of male song and female acoustic  
798 preference QTL underlying a rapid species radiation. In *Proceedings of the National*  
799 *Academy of Sciences* (Vol. 106, pp. 9737-9742).
- 800 Shinmyo, Y., Mito, T., Matsushita, T., Sarashina, I., Miyawaki, K., Ohuchi, H., & Noji, S. (2004).  
801 piggyBac-mediated somatic transformation of the two-spotted cricket, *Gryllus*  
802 *bimaculatus*. In *Development, Growth and Differentiation* (Vol. 46, pp. 343-349).
- 803 Simão, F. A., Waterhouse, R. M., Ioannidis, P., Kriventseva, E. V., & Zdobnov, E. M. (2015).  
804 BUSCO: assessing genome assembly and annotation completeness with single-copy  
805 orthologs. In *Bioinformatics* (Vol. 31, pp. 3210-3212).
- 806 Smit, A., Huble, R., & Grenn, P. (2015). RepeatMasker Open-4.0. *RepeatMasker Open-4.0.7*.
- 807 Srinroch, C., Srisomsap, C., Chokchaichamnankit, D., Punyarit, P., & Phiriyangkul, P. (2015).  
808 Identification of novel allergen in edible insect, *Gryllus bimaculatus* and its cross-  
809 reactivity with *Macrobrachium* spp. allergens. In *Food Chemistry* (Vol. 184, pp. 160-  
810 166).
- 811 Stanke, M., & Waack, S. (2003). Gene prediction with a hidden Markov model and a new  
812 intron submodel. In *Bioinformatics* (Vol. 19, pp. ii215-ii225).
- 813 Stull, V. J., Finer, E., Bergmans, R. S., Febvre, H. P., Longhurst, C., Manter, D. K., . . . Weir, T. L.  
814 (2018). Impact of Edible Cricket Consumption on Gut Microbiota in Healthy Adults,  
815 a Double-blind, Randomized Crossover Trial. In *Scientific Reports* (Vol. 8, pp. 10762).
- 816 Suyama, M., Torrents, D., & Bork, P. (2006). PAL2NAL: Robust conversion of protein  
817 sequence alignments into the corresponding codon alignments. In *Nucleic Acids*  
818 *Research* (Vol. 34, pp. W609-W612).
- 819 Ter-Hovhannisyanyan, V., Lomsadze, A., Chernoff, Y. O., & Borodovsky, M. (2008). Gene  
820 prediction in novel fungal genomes using an ab initio algorithm with unsupervised  
821 training. In *Genome Research* (Vol. 18, pp. 1979-1990).
- 822 Terrapon, N., Li, C., Robertson, H. M., Ji, L., Meng, X., Booth, W., . . . Liebig, J. (2014).  
823 Molecular traces of alternative social organization in a termite genome. In *Nat*  
824 *Commun* (Vol. 5, pp. 3636).
- 825 Thomas, G. W. C., Dohmen, E., Hughes, D. S. T., Murali, S. C., Poelchau, M., Glastad, K., . . .  
826 Richards, S. (2020). Gene content evolution in the arthropods. *Genome Biol*, 21(1),  
827 15.
- 828 Thrall, P. H., Bever, J. D., & Burdon, J. J. (2010). Evolutionary change in agriculture: the past,  
829 present and future. *Evol Appl*, 3(5-6), 405-408.
- 830 Thurmond, J., Goodman, J. L., Strelets, V. B., Attrill, H., Gramates, L. S., Marygold, S. J., . . .  
831 FlyBase, C. (2019). FlyBase 2.0: the next generation. *Nucleic Acids Res*, 47(D1), D759-  
832 D765.
- 833 UniProt, C. (2019). UniProt: a worldwide hub of protein knowledge. *Nucleic Acids Res*,  
834 47(D1), D506-D515.
- 835 Van Huis, A., Van Itterbeeck, J., Klunder, H., Mertens, E., Halloran, A., Muir, G., & Vantomme,  
836 P. (2013). *Edible insects: future prospects for food and feed security*: Food and  
837 agriculture organization of the United Nations (FAO).

- 838 Vassetzky, N. S., & Kramerov, D. A. (2013). SINEBase: a database and tool for SINE analysis.  
839 In *Nucleic acids research* (Vol. 41, pp. D83-89).
- 840 Wang, X., Fang, X., Yang, P., Jiang, X., Jiang, F., Zhao, D., . . . Kang, L. (2014). The locust  
841 genome provides insight into swarm formation and long-distance flight. In *Nature*  
842 *communications* (Vol. 5, pp. 2957).
- 843 Wang, Y., Jorda, M., Jones, P. L., Maleszka, R., Ling, X., Robertson, H. M., . . . Robinson, G. E.  
844 (2006). Functional CpG Methylation System in a Social Insect. In *Science* (Vol. 314,  
845 pp. 645-647).
- 846 Wilson Horch, H., Mito, T., Popadić, A., Ohuchi, H., & Noji, S. (2017). The cricket as a model  
847 organism: Development, regeneration, and behavior. In H. W. Horch, T. Mito, A.  
848 Popadić, H. Ohuchi, & S. Noji (Eds.), *The Cricket as a Model Organism: Development,*  
849 *Regeneration, and Behavior* (pp. 1-376). Tokyo.
- 850 Xu, M., & Shaw, K. L. (2019). The genetics of mating song evolution underlying rapid  
851 speciation: Linking quantitative variation to candidate genes for behavioral  
852 isolation. In *Genetics* (Vol. 211, pp. 1089-1104).
- 853 Yamasaki, M., Tenaillon, M. I., Bi, I. V., Schroeder, S. G., Sanchez-Villeda, H., Doebley, J. F., . . .  
854 McMullen, M. D. (2005). A large-scale screen for artificial selection in maize  
855 identifies candidate agronomic loci for domestication and crop improvement. *Plant*  
856 *Cell*, 17(11), 2859-2872.
- 857 Yang, Z. (2007). PAML 4: Phylogenetic Analysis by Maximum Likelihood. In *Molecular*  
858 *Biology and Evolution* (Vol. 24, pp. 1586-1591).
- 859 Ylla, G., Piulachs, M.-D., & Belles, X. (2018). Comparative transcriptomics in two extreme  
860 neopterans reveal general trends in the evolution of modern insects. In *iScience* (Vol.  
861 4, pp. 164-179).
- 862 Zelle, K. M., Lu, B., Pyfrom, S. C., & Ben-Shahar, Y. (2013). The genetic architecture of  
863 degenerin/epithelial sodium channels in *Drosophila*. In *G3: Genes, Genomes, Genetics*  
864 (Vol. 3, pp. 441-450).
- 865 Zeng, V., Ewen-Campen, B., Horch, H. W., Roth, S., Mito, T., & Extavour, C. G. (2013).  
866 Developmental Gene Discovery in a Hemimetabolous Insect: De Novo Assembly and  
867 Annotation of a Transcriptome for the Cricket *Gryllus bimaculatus*. In P. K. Dearden  
868 (Ed.), *PLoS One* (Vol. 8, pp. e61479).
- 869 Zhong, L., Hwang, R. Y., & Tracey, W. D. (2010). Pickpocket Is a DEG/ENaC Protein Required  
870 for Mechanical Nociception in *Drosophila* Larvae. In *Current Biology* (Vol. 20, pp.  
871 429-434).

872

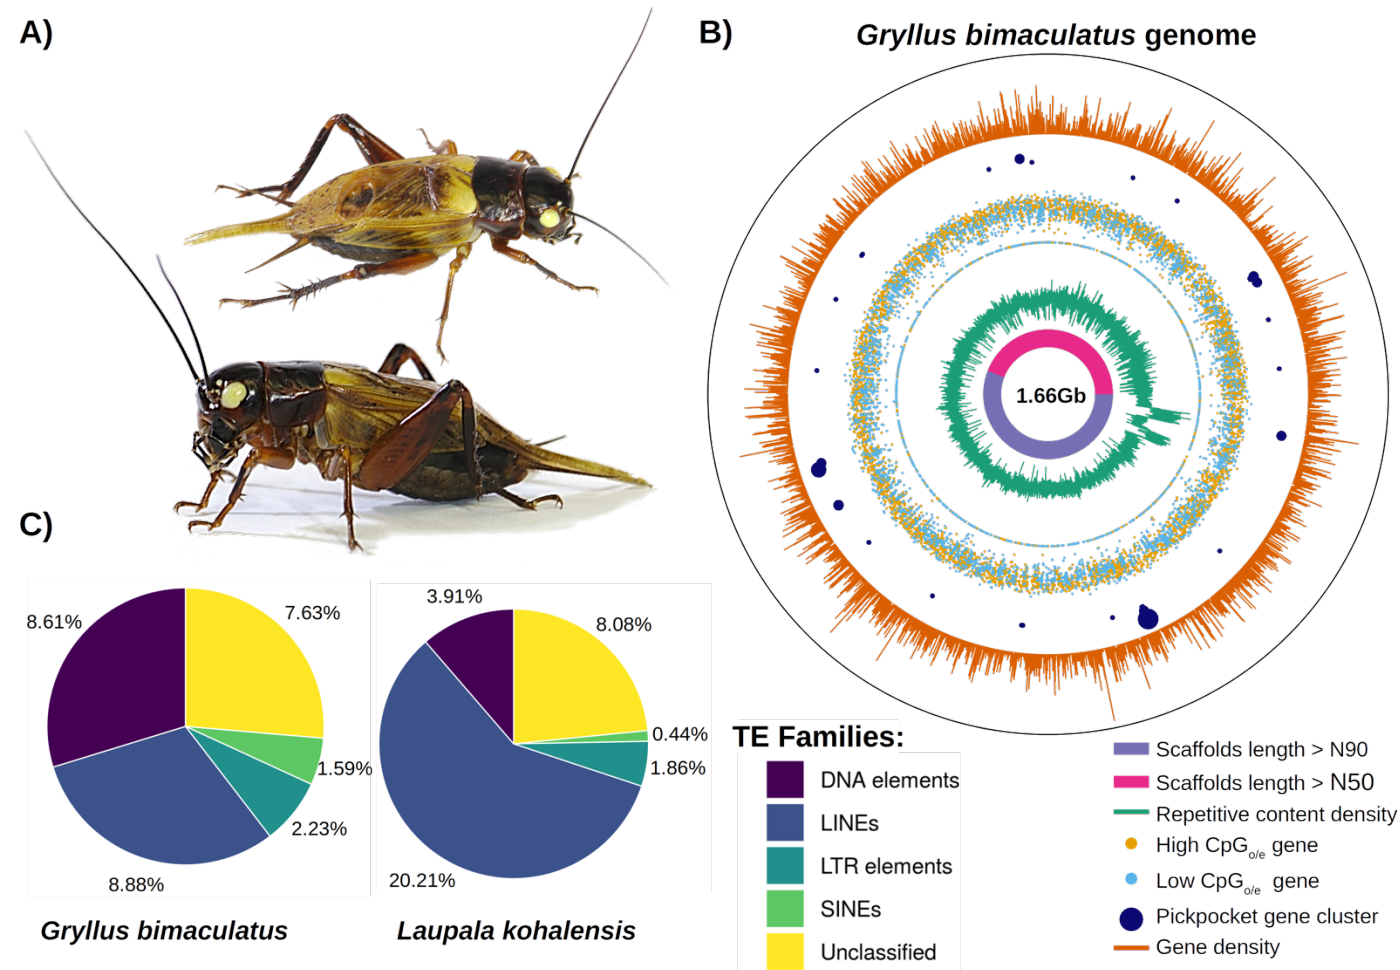

875 **Figure 1: The *G. bimaculatus* genome.** **A)** The cricket *G. bimaculatus* (top and side views), commonly called the two-spotted cricket, owes its name to the two yellow  
 876 spots on the base of the forewings. **B)** Circular representation of the N50 (pink) and N90 (purple) scaffolds, repetitive content density (green), the high- (yellow) and  
 877 low- (light blue) CpG<sub>o/e</sub> value genes, *pickpocket* gene clusters (dark blue), and gene density (orange). **C)** The proportion of the genome made up of different families of  
 878 transposable elements is different between the cricket species *G. bimaculatus* and *L. kohalensis*.



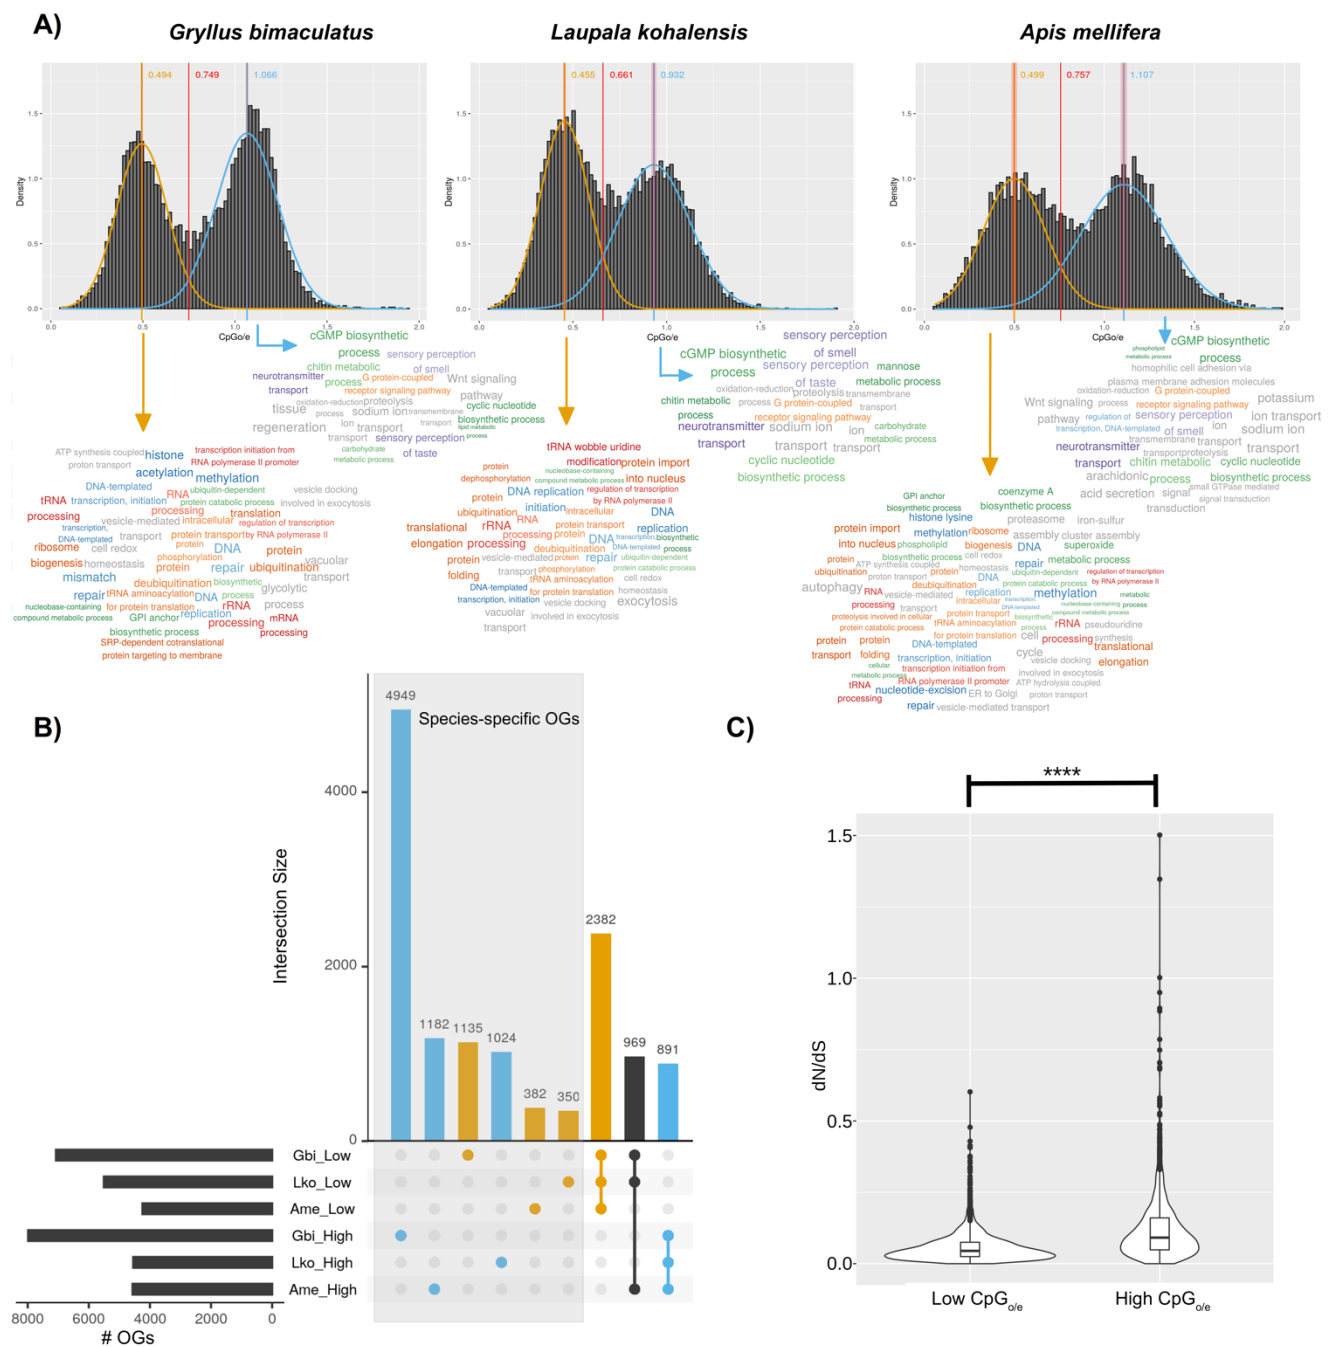

879

880 **Figure 2: CpG<sub>0/e</sub> distribution across insects and functional analysis. A)** The  
 881 distribution of CpG<sub>0/e</sub> values within the CDS regions displays a bimodal distribution in both  
 882 crickets and in the honeybee *A. mellifera*. We modeled each peak with a normal distribution  
 883 and defined their intersection (red line) as a threshold to separate genes into high- and  
 884 low- CpG<sub>0/e</sub> value categories. The significantly enriched (p-value<0.05) GO terms from the  
 885 genes belonging to each group is represented as a word cloud with the font size of each  
 886 term proportional to their fold change, and color-coded to indicate functional categories:  
 887 red = RNA/transcription, blue = DNA/repair/histone/methylation, orange =  
 888 protein/translation/ribosome, green = metabolism/catabolism/biosynthesis, purple =  
 889 sensory/perception/neuro, and gray for others. **B)** UpSet plot showing the total number of  
 890 orthogroups (OGs) belonging to each category (horizontal bar chart) and the number of  
 891 them that are common across different categories (linked dots) or exclusive to a single  
 892 category (unlinked dot). For all three insects, the species-specific OGs largely correspond to  
 893 high CpG<sub>0/e</sub> value genes, while low CpG<sub>0/e</sub> value genes are more likely to have orthologs in  
 894 the other species. This plot shows only the non-overlapping categories and the three most  
 895 common combinations; the remaining possible combinations are shown in  
 896 **Supplementary Figure 4. C)** One-to-one orthologous genes with low CpG<sub>0/e</sub> values in both  
 897 crickets have significantly lower dN/dS values than genes with high CpG<sub>0/e</sub> values.

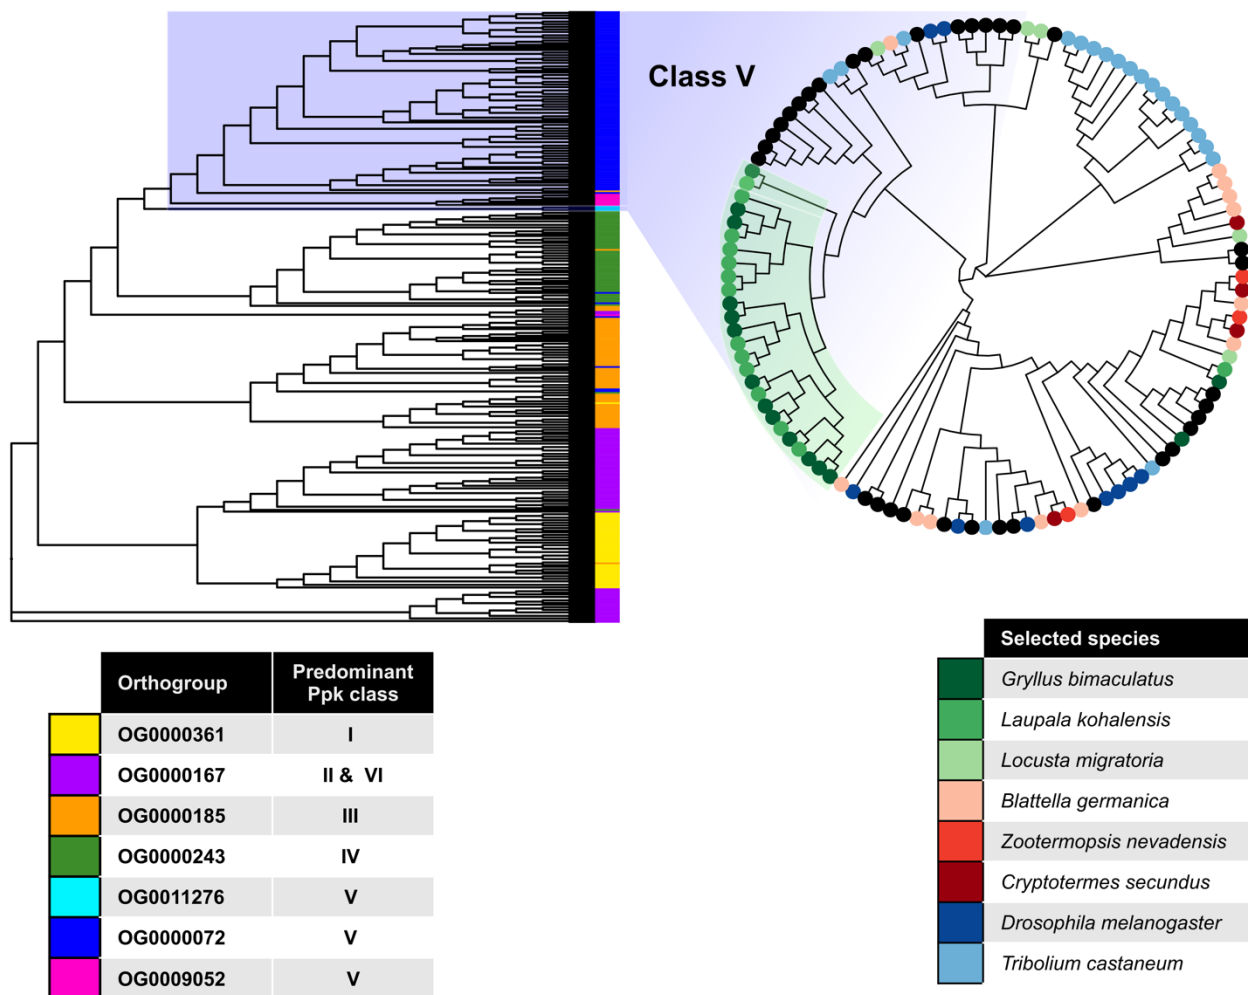

898

899 **Figure 3: The *pickpocket* gene family class V is expanded in crickets.** *pickpocket* gene  
 900 tree with all the genes belonging to the seven OGs that contain the *D. melanogaster*  
 901 *pickpocket* genes. All OGs predominantly contain members of a single *ppk* family, except  
 902 OG0000167, which contains members of two *pickpocket* classes, II and VI. The *pickpocket*  
 903 class V (circular cladogram) was significantly expanded in crickets relative to other insects.

904

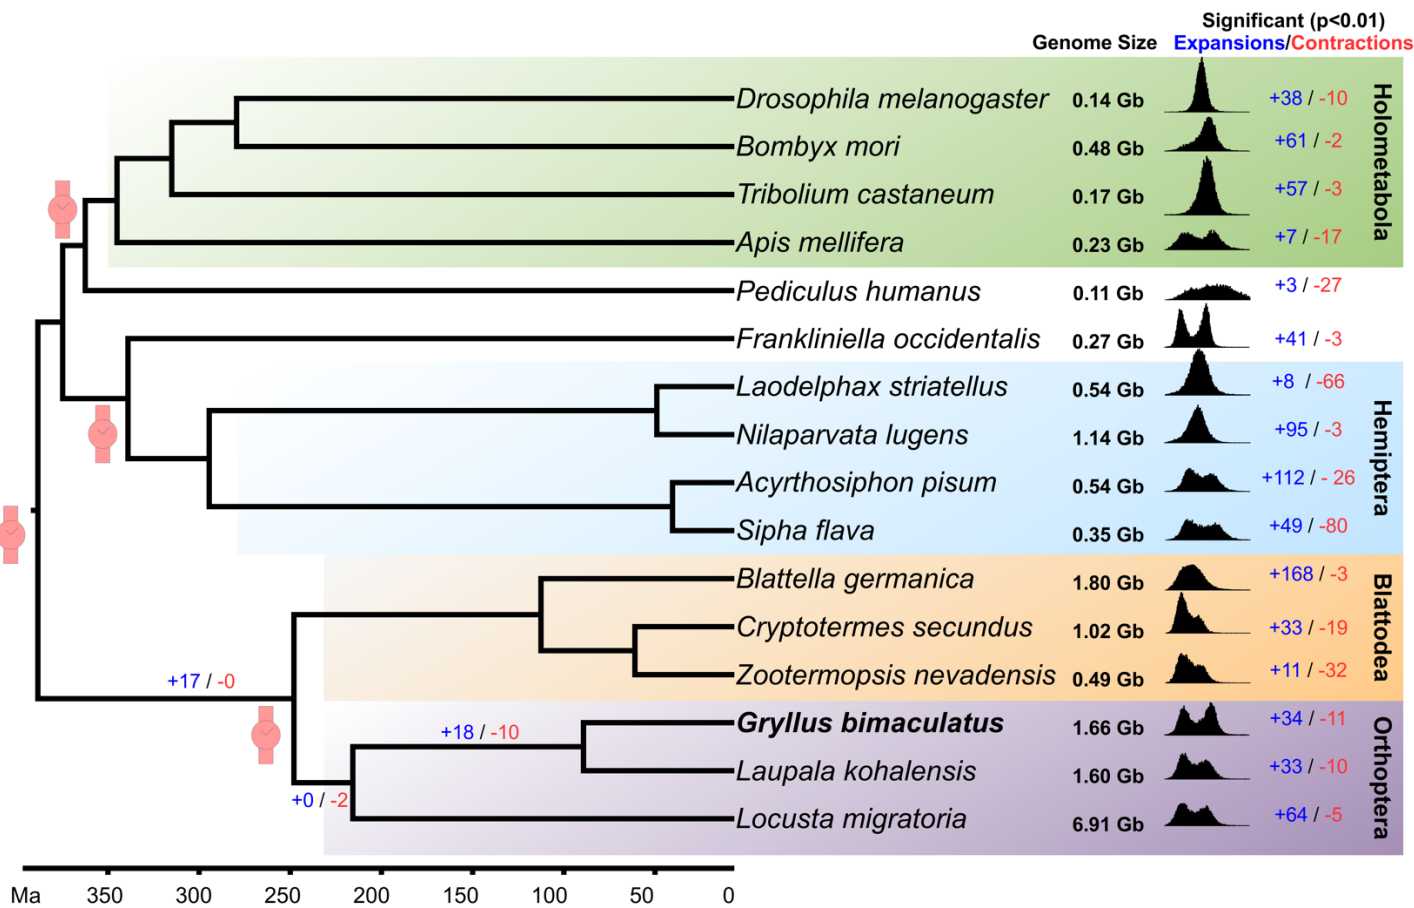

905

906 **Figure 4: Cricket genomes in the context of insect evolution.** A phylogenetic tree  
 907 including 16 insect species calibrated at four different time points (red watch symbols)  
 908 based on Misof et al. (2014), suggests that *G. bimaculatus* and *L. kohalensis* diverged ca. 89.2  
 909 Mya. The number of expanded (blue text) and contracted (red text) gene families is shown  
 910 for each insect, and for the branches leading to crickets. The density plots show the CpG<sub>o/e</sub>  
 911 distribution for all genes for each species. The genome size in Gb, was obtained from the  
 912 genome fasta files (**Supplementary Table 1**).
